# Supplementary material
Source: Springer Nature journal article supplement (https://www.springermedizin.de/resource/supplementary/12963_2010_132_MOESM2_ESM.pdf/9572724)

■ = uni-conditional utility loss

▨ = comorbid utility loss

*Cases without pre-existing disease*

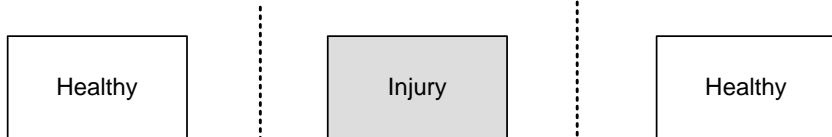

*Cases with pre-existing disease*

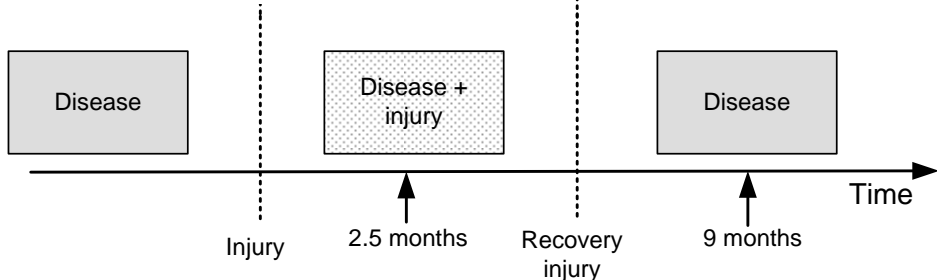

Supplement: MOESM2 [file 9572724]
